# Supplementary material
Source: MDPI journal article supplement (https://www.mdpi.com/2073-4352/12/8/1081)
Supplement: s1 [file s1 › crystals-1819426-supplementary.pdf]

# Optical Properties of Yttria-Stabilized Zirconia Single-Crystals Doped with Terbium Oxide

Yazhao Wang, Zhonghua Zhu, Shengdi Ta, Zeyu Cheng, Peng Zhang, Ninghan Zeng, Bernard Albert Goodman, Shoulei Xu \* and Wen Deng \*

School of Physical Science and Technology, Guangxi University, 100 East Daxue Road, Nanning 530004, China; 2007301142@st.gxu.edu.cn (Y.W.); 2107301199@st.gxu.edu.cn (Z.Z.); 2007301125@st.gxu.edu.cn (S.T.); 2007301021@st.gxu.edu.cn (Z.C.); 2007301183@st.gxu.edu.cn (P.Z.); 2107301006@st.gxu.edu.cn (N.Z.); bernard\_a\_goodman@outlook.com (B.A.G.)

\* Correspondence: wdeng@gxu.edu.cn (W.D.); xsl@gxu.edu.cn (S.X.); Tel.: +86-771-3232666

## 3. Results and Discussion

### 3.1. Crystal phase structure analysis

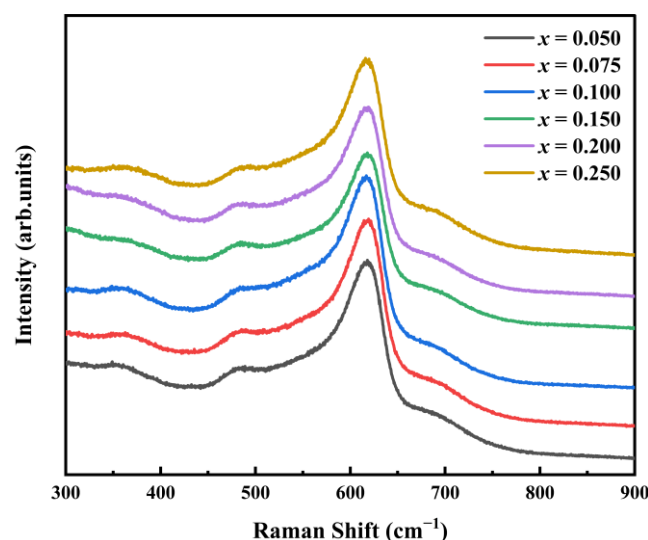

**Figure S1.** Raman spectra of  $(\text{ZrO}_2)_{92}(\text{Y}_2\text{O}_3)_{8-x}(\text{Tb}_4\text{O}_7)_x$  ( $x = 0.050\text{--}0.250$ ) crystals before annealing.

### 3.2. XPS

The Zr 3d core energy level spectra at 184.8 and 182.4 eV (Figure S2) correspond to the Zr 3d<sub>3/2</sub> and Zr 3d<sub>5/2</sub> spin-orbit doublet states. These were shifted slightly to 184.7 and 182.2 eV in the annealed sample. Similarly, the core energy level spectrum of Y<sup>3+</sup> 3d contains peaks from the Y 3d<sub>3/2</sub> and Y 3d<sub>5/2</sub> spin orbit states. The two peaks at 159.3 and 157.6 eV resolved from Y<sup>3+</sup> in the unannealed crystal shifted to 159.2 and 157.3 eV in the annealed sample (Figure S3). These results confirm that the Zr and Y valence state were not changed by annealing.

**Citation:** Wang, Y.; Zhu, Z.; Ta, S.; Cheng, Z.; Zhang, P.; Zeng, N.; Goodman, B.A.; Xu, S.; Deng, W. Optical Properties of Yttria-stabilized Zirconia Single Crystals Doped with Terbium Oxide. *Crystals* **2022**, *12*, 1081. <https://doi.org/10.3390/cryst12081081>

Academic Editor: Alessandro Chiasera

Received: 30 June 2022

Accepted: 29 July 2022

Published: 1 August 2022

**Publisher's Note:** MDPI stays neutral with regard to jurisdictional claims in published maps and institutional affiliations.

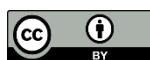

**Copyright:** © 2022 by the authors. Licensee MDPI, Basel, Switzerland. This article is an open access article distributed under the terms and conditions of the Creative Commons Attribution (CC BY) license (<https://creativecommons.org/licenses/by/4.0/>).

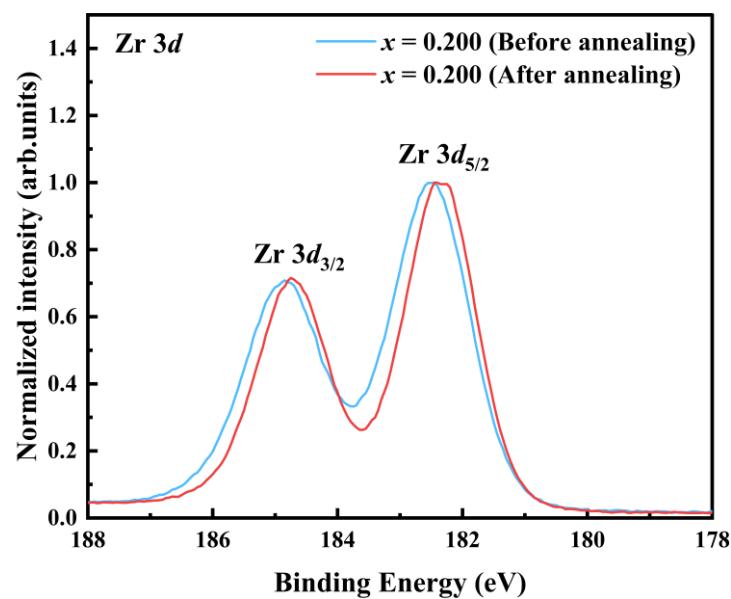

Figure S2. XPS Zr 3d core energy level spectrum of  $(ZrO_2)_{92}(Y_2O_3)_{7.800}(Tb_4O_7)_{0.200}$  single crystals before and after annealing at 1500 °C in an  $H_2/Ar$  atmosphere;

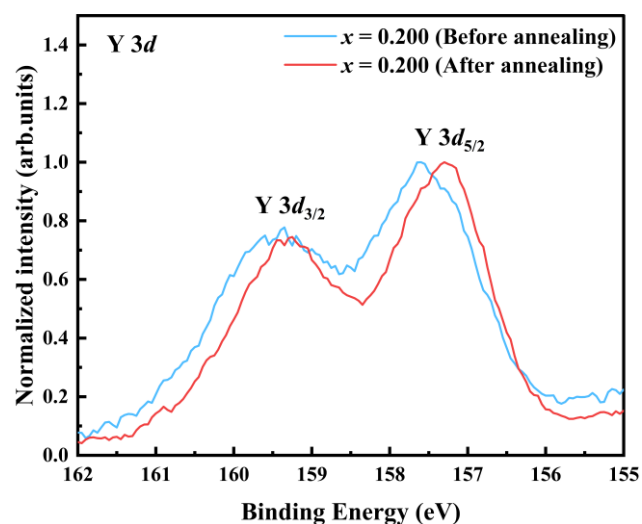

Figure S3. XPS Y 3d core energy level spectrum of  $(ZrO_2)_{92}(Y_2O_3)_{7.800}(Tb_4O_7)_{0.200}$  single crystals before and after annealing at 1500 °C in an  $H_2/Ar$  atmosphere.
